# Supplementary material
Source: PubMed Central journal article supplement (PMC7391139)
Supplement: advancesADV2020001955-suppl1.pdf [file advancesADV2020001955-suppl1.pdf]

## Supplemental Appendix

### Lenalidomide/rituximab induces high molecular response in untreated follicular lymphoma: LYSA ancillary RELEVANCE study

Delfau-Larue et al

**Supplemental Table S1:** t(14;18) detection at diagnosis in 222 informative patients

\*For those non-informative patients in PB or BM, t(14,18) was identified in lymph nodes.

|                 |                      | PBL at Diagnosis |                |                     |
|-----------------|----------------------|------------------|----------------|---------------------|
|                 |                      | (+)<br>(n = 213) | (-)<br>(n = 7) | Not Done<br>(n = 2) |
| BM at Diagnosis | (+)<br>(n = 136)     | 131              | 3              | 2                   |
|                 | (-)<br>(n = 3)       | 2                | 1*             | 0                   |
|                 | Not Done<br>(n = 83) | 80               | 3*             | 0                   |
|                 |                      |                  |                |                     |

**Supplemental Table S2.** Comparison between population with MRD available and population without MRD available in the 581 French population

|                                                | MRD Data<br>(n = 222) | No MRD Data<br>(n = 359) | All<br>(N = 581) | P    |
|------------------------------------------------|-----------------------|--------------------------|------------------|------|
| <b>Median (range) age, y</b>                   | 60 (30-89)            | 61 (32-83)               | 60 (30-89)       | .3   |
| <b>Male, n (%)</b>                             | 120 (54)              | 160 (45)                 | 280 (48)         | .027 |
| <b>ECOG PS, n (%)</b>                          |                       |                          |                  |      |
| 0                                              | 148 (67)              | 223 (62)                 | 371 (64)         | .09  |
| 1                                              | 69 (31)               | 115 (32)                 | 184 (32)         |      |
| 2                                              | 4 (2)                 | 20 (6)                   | 24 (4)           |      |
| Not evaluated                                  | 1 (0.5)               | 1 (0.3)                  | 2 (0.3)          |      |
| <b>Ann Arbor stage, n (%)</b>                  |                       |                          |                  |      |
| I-II                                           | 8 (4)                 | 36 (10)                  | 44 (8)           | .004 |
| III-IV                                         | 214 (96)              | 323 (90)                 | 537 (92)         |      |
| <b>Nodal mass &gt; 6 cm, n (%)</b>             | 110 (50)              | 186 (52)                 | 296 (51)         | .06  |
| <b>FLIPI score, n (%)</b>                      |                       |                          |                  |      |
| 0-1                                            | 19 (9)                | 61 (17)                  | 80 (14)          | .002 |
| 2                                              | 91 (41)               | 107 (30)                 | 198 (34)         |      |
| 3-5                                            | 111 (50)              | 191 (53)                 | 302 (52)         |      |
| Missing                                        | 1 (0.5)               | 0                        | 1 (0.2)          |      |
| <b>FLIPI 2 score, n (%)</b>                    |                       |                          |                  |      |
| 0-1                                            | 58 (26)               | 96 (27)                  | 154 (27)         | .96  |
| 2                                              | 65 (29)               | 105 (29)                 | 170 (29)         |      |
| 3-5                                            | 95 (43)               | 148 (41)                 | 243 (42)         |      |
| Missing                                        | 4 (2)                 | 10 (3)                   | 14 (2)           |      |
| <b>Number of peripheral lymph nodes, n (%)</b> |                       |                          |                  |      |
| ≤4                                             | 105 (47)              | 196 (55)                 | 301 (52)         | .09  |
| >4                                             | 117 (53)              | 163 (45)                 | 280 (48)         |      |
| <b>Treatment, n (%)</b>                        |                       |                          |                  |      |
| R-CVP                                          | 1 (0.5)               | 10 (3)                   | 11 (2)           | —    |
| R-CHOP                                         | 99 (45)               | 175 (49)                 | 274 (47)         |      |
| R <sup>2</sup>                                 | 122 (55)              | 174 (48)                 | 296 (51)         |      |
| <b>β2M (mg/L), n (%)</b>                       |                       |                          |                  |      |
| <3 mg/L                                        | 138 (62)              | 234 (65)                 | 372 (64)         | .46  |
| ≥3 mg/L                                        | 78 (35)               | 114 (32)                 | 192 (33)         |      |
| Missing                                        | 6 (3)                 | 11 (3)                   | 17 (3)           |      |
| <b>Elevated LDH (&gt;ULN), n (%)</b>           |                       |                          |                  |      |
| No                                             | 158 (71)              | 242 (67)                 | 400 (69)         | .36  |
| Yes                                            | 63 (28)               | 115 (32)                 | 178 (31)         |      |
| Missing                                        | 1 (0.5)               | 2 (0.6)                  | 3 (0.5)          |      |
| <b>BM involvement, n (%)</b>                   |                       |                          |                  |      |
| No                                             | 75 (34)               | 175 (49)                 | 250 (43)         | .003 |
| Yes                                            | 137 (62)              | 174 (48)                 | 311 (54)         |      |
| Unspecified                                    | 4 (2)                 | 4 (1)                    | 8 (1)            |      |
| Not done                                       | 6 (3)                 | 6 (2)                    | 12 (2)           |      |

$\beta$ 2M, beta-2 microglobulin; BM, bone marrow; ECOG PS, Eastern Cooperative Oncology Group performance status; FLIPI, Follicular Lymphoma International Prognostic Index; LDH, lactate dehydrogenase; R-CHOP, rituximab plus cyclophosphamide, doxorubicin, vincristine, and prednisone; R-CVP, rituximab plus cyclophosphamide, vincristine, and prednisone; ULN, upper limit of normal.

**Supplemental Table S3.** Comparison between population with MRD available and population without MRD available in the N = 1030 total RELEVANCE population

|                                                | MRD Data<br>(n = 222) | No MRD Data<br>(n = 808) | All<br>(N = 1030) | P    |
|------------------------------------------------|-----------------------|--------------------------|-------------------|------|
| <b>Median (range) age, y</b>                   | 60 (30-89)            | 59 (23-85)               | 59 (23-89)        | .08  |
| <b>Male, n (%)</b>                             | 120 (54)              | 382 (47)                 | 502 (49)          | .71  |
| <b>ECOG PS, n (%)</b>                          |                       |                          |                   |      |
| 0                                              | 148 (67)              | 538 (67)                 | 686 (67)          | .72  |
| 1                                              | 69 (31)               | 245 (30)                 | 314 (30)          |      |
| 2                                              | 4 (2)                 | 23 (3)                   | 27 (3)            |      |
| Not evaluated                                  | 1 (0.5)               | 2 (0.2)                  | 3 (0.3)           |      |
| <b>Ann Arbor stage, n (%)</b>                  |                       |                          |                   |      |
| II-II                                          | 8 (4)                 | 62 (8)                   | 70 (7)            | .034 |
| III-IV                                         | 214 (96)              | 746 (92)                 | 960 (93)          |      |
| <b>Nodal mass &gt;6 cm, n (%)</b>              | 110 (50)              | 396 (49)                 | 506 (49)          | .94  |
| <b>FLIPI score, n (%)</b>                      |                       |                          |                   |      |
| 0-1                                            | 19 (9)                | 134 (17)                 | 153 (15)          | .007 |
| 2                                              | 91 (41)               | 283 (35)                 | 374 (36)          |      |
| 3-5                                            | 111 (50)              | 390 (48)                 | 501 (49)          |      |
| Missing                                        | 1 (0.5)               | 1 (0.1)                  | 2 (0.2)           |      |
| <b>FLIPI 2 score, n (%)</b>                    |                       |                          |                   |      |
| 0-1                                            | 58 (26)               | 245 (30)                 | 303 (29)          | .46  |
| 2                                              | 65 (29)               | 226 (28)                 | 291 (28)          |      |
| 3-5                                            | 95 (43)               | 321 (40)                 | 416 (40)          |      |
| Missing                                        | 4 (2)                 | 16 (2)                   | 20 (2)            |      |
| <b>Number of peripheral lymph nodes, n (%)</b> |                       |                          |                   |      |
| ≤4                                             | 105 (47)              | 428 (53)                 | 533 (52)          | .15  |
| >4                                             | 117 (53)              | 379 (47)                 | 496 (48)          |      |
| Missing                                        | 0                     | 1 (0.1)                  | 1 (0.1)           |      |
| <b>Treatment, n (%)</b>                        |                       |                          |                   |      |
| R-CVP                                          | 1 (0.5)               | 27 (3)                   | 28 (3)            | —    |
| R-bendamustine                                 | 0                     | 117 (14)                 | 117 (11)          |      |
| R-CHOP                                         | 99 (45)               | 273 (34)                 | 372 (36)          |      |
| R <sup>2</sup>                                 | 122 (55)              | 391 (48)                 | 513 (50)          |      |
| <b>β2M (mg/L), n (%)</b>                       |                       |                          |                   |      |
| <3 mg/l                                        | 138 (62)              | 508 (63)                 | 646 (63)          | .75  |
| ≥3 mg/L                                        | 78 (35)               | 272 (34)                 | 350 (34)          |      |
| Missing                                        | 6 (3)                 | 28 (3)                   | 34 (3)            |      |
| <b>Elevated LDH (&gt;ULN), n (%)</b>           |                       |                          |                   |      |
| No                                             | 158 (71)              | 574 (71)                 | 732 (71)          | .99  |
| Yes                                            | 63 (28)               | 230 (28)                 | 293 (28)          |      |
| Missing                                        | 1 (0.5)               | 4 (0.5)                  | 5 (0.5)           |      |
| <b>BM involvement, n (%)</b>                   |                       |                          |                   |      |
| No                                             | 75 (34)               | 364 (45)                 | 439 (43)          | .002 |

|             | MRD Data<br>(n = 222) | No MRD Data<br>(n = 808) | All<br>(N = 1030) | <i>P</i> |
|-------------|-----------------------|--------------------------|-------------------|----------|
| Yes         | 137 (62)              | 431 (53)                 | 568 (55)          |          |
| Unspecified | 4 (2)                 | 7 (1)                    | 11 (1)            |          |
| Not done    | 6 (3)                 | 6 (1)                    | 12 (1)            |          |

β2M, beta-2 microglobulin; BM, bone marrow; ECOG PS, Eastern Cooperative Oncology Group performance status; FLIPI, Follicular Lymphoma International Prognostic Index; LDH, lactate dehydrogenase; R-CHOP, rituximab plus cyclophosphamide, doxorubicin, vincristine, and prednisone; R-CVP, rituximab plus cyclophosphamide, vincristine, and prednisone; ULN, upper limit of normal.

**Supplemental Table S4.** Distribution of PB and BM samples at W24 compared with diagnosis

|             |                      | Diagnosis (n=222)    |                     |                    |
|-------------|----------------------|----------------------|---------------------|--------------------|
| W24 (n=207) |                      | PB Alone<br>(n = 82) | BM Alone<br>(n = 2) | PB+BM<br>(n = 137) |
|             | PB Alone<br>(n = 74) | 35                   | 1                   | 38                 |
|             | BM Alone<br>(n = 3)  | 2                    | -                   | 1                  |
|             | PB+BM<br>(n = 130)   | 38                   | 1                   | 91                 |
|             | Not Done<br>(n = 15) | 8                    |                     | 7                  |

Supplemental Figure S1. Design of the international, multicenter, randomized RELEVANCE study, and sample collection

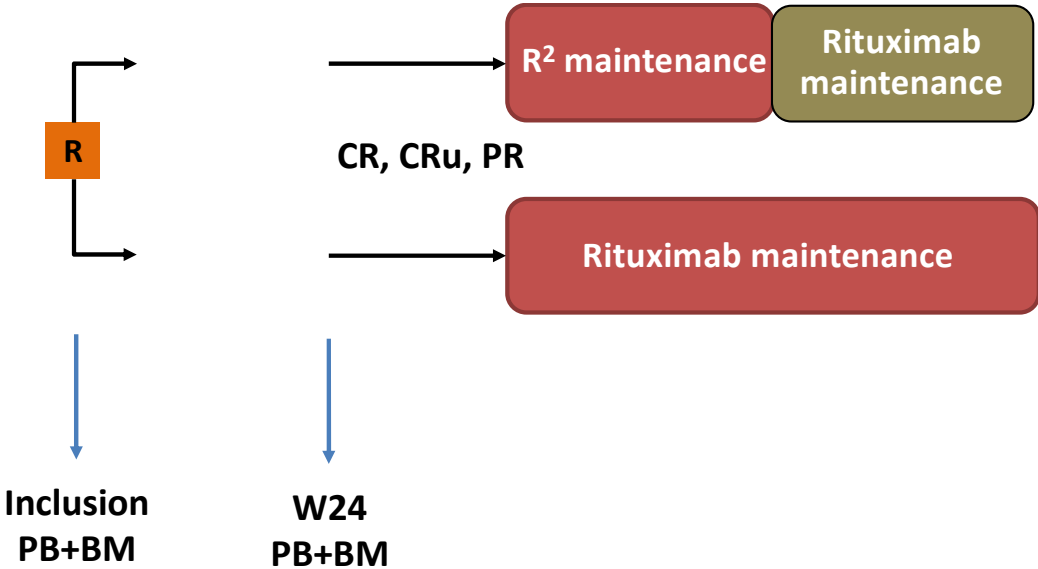

**Supplemental Figure S2 : Impact of Peripheral Blood or Bone Marrow-positive MRD on progression-free survival according to treatment arms**

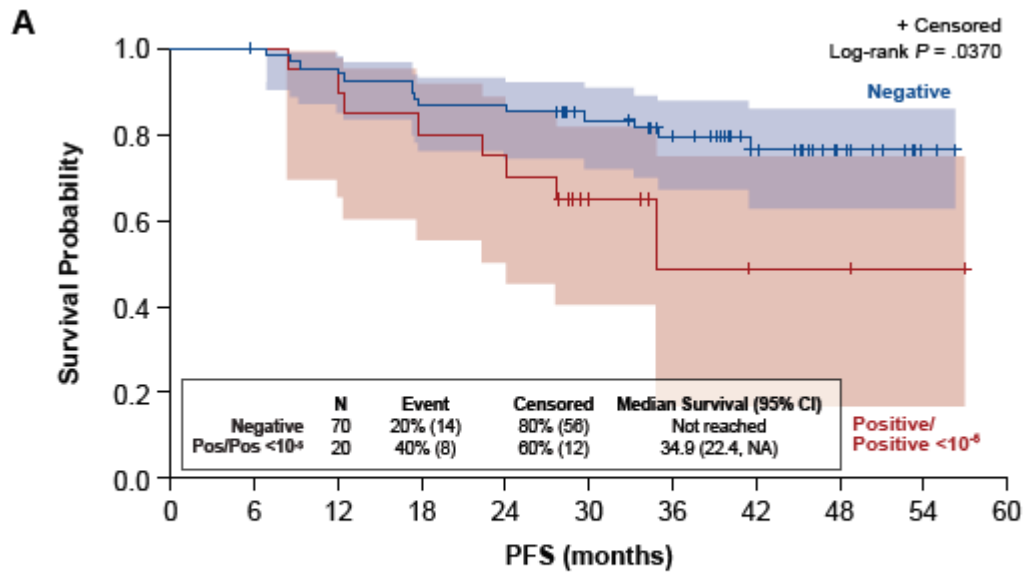

|                    |    |    |    |    |    |    |    |    |    |   |   |
|--------------------|----|----|----|----|----|----|----|----|----|---|---|
| Negative           | 70 | 68 | 64 | 59 | 58 | 46 | 38 | 24 | 11 | 2 | 0 |
| Pos/Pos $<10^{-4}$ | 20 | 20 | 18 | 16 | 15 | 7  | 3  | 2  | 2  | 1 | 0 |

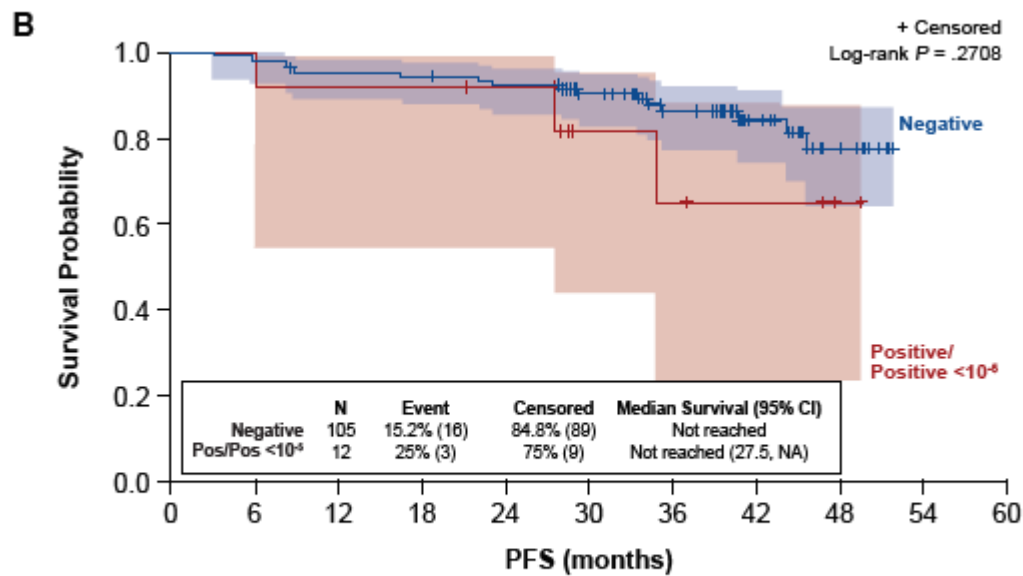

|                    |     |     |    |    |    |    |    |    |   |   |
|--------------------|-----|-----|----|----|----|----|----|----|---|---|
| Negative           | 105 | 103 | 99 | 98 | 95 | 82 | 55 | 34 | 9 | 0 |
| Pos/Pos $<10^{-4}$ | 12  | 12  | 11 | 11 | 10 | 5  | 4  | 3  | 1 | 0 |
